# Supplementary material
Source: ML conference proceedings conference paper supplement (https://proceedings.mlr.press/v80/lorenzi18a.html)
Supplement: Supplementary file [file lorenzi18a-supp.pdf]

---

# Supplementary material for paper: Constraining the Dynamics of Deep Probabilistic Models

---

Marco Lorenzi<sup>1</sup> Maurizio Filippone<sup>2</sup>

## 1. Description of the ODE systems considered in this work

**Lotka-Volterra** (Goel et al., 1971). This ODE describes a two-dimensional process with the following dynamics:

$$\frac{df_1}{dt} = \alpha f_1 - \beta f_1 f_2; \quad \frac{df_2}{dt} = -\gamma f_2 + \delta f_1 f_2,$$

and is identified by the parameters  $\theta = \{\alpha, \beta, \gamma, \delta\}$ . Following (Niu et al., 2016) we generated a ground truth from numerical integration of the system with parameters  $\theta = \{0.2, 0.35, 0.7, 0.4\}$  over the interval  $[0, 30]$  and with initial condition  $[1, 2]$ . We generated two different configurations, composed by respectively 34 and 51 observations sampled at uniformly spaced points, and corrupted by zero mean Gaussian noise with standard deviation  $\sigma = 0.25$  and  $\sigma = 0.4$  respectively.

**FitzHugh-Nagumo** (FitzHugh, 1955). This system describes a two-dimensional process governed by 3 parameters,  $\theta = \{a, b, c\}$ :

$$\frac{df_1}{dt} = c(f_1 - b \frac{(f_1)^3}{3} + f_2); \quad \frac{df_2}{dt} = -\frac{1}{c}(f_1 - a + b * f_2).$$

We reproduced the experimental setting proposed in (Macdonald & Husmeier, 2015), by generating a ground truth with  $\theta = \{3, 0.2, 0.2\}$ , and by integrating the system numerically with initial condition  $[-1, 1]$ . We created two scenarios; in the first one, we sampled 401 observations at equally spaced points within the interval  $[0, 20]$ , while in the second one we sampled only 20 points. In both cases we corrupted the observations with zero-mean Gaussian noise with  $\sigma = 0.5$ .

**Biopathways** (Vyshemirsky & Girolami, 2007). These equations describe a five-dimensional process associated with 6 parameters  $\theta = \{k_1, k_2, k_3, k_4, V, K_m\}$  as follows:

$$\begin{aligned} \frac{df_1}{dt} &= -k_1 f_1 - k_2 f_1 f_3 + k_3 f_4; \\ \frac{df_2}{dt} &= k_1 f_1; \\ \frac{df_3}{dt} &= -k_2 f_1 f_3 + k_3 f_4 + \frac{V f_5}{K_m + f_5}; \\ \frac{df_4}{dt} &= k_2 f_1 f_3 - k_3 f_4 - k_4 f_4; \\ \frac{df_5}{dt} &= k_4 f_4 - \frac{V f_5}{K_m + f_5}. \end{aligned}$$

We generated data by sampling 15 observations at times  $\mathbf{t} = \{0, 1, 2, 4, 5, 7, 10, 15, 20, 30, 40, 50, 60, 80, 100\}$  (Macdonald & Husmeier, 2015). The ODE parameters were set to  $\theta = \{k_1 = 0.07, k_2 = 0.6, k_3 = 0.05, k_4 = 0.3, V = 0.017, K_m = 0.3\}$ , and the initial values were  $[1, 0, 1, 0, 0]$ . We generated two different scenarios, by adding Gaussian noise with  $\sigma^2 = 0.1$  and  $\sigma^2 = 0.05$ , respectively.

---

\*Equal contribution <sup>1</sup>University of Cote d’Azur, INRIA Sophia Antipolis, EPIONE research group, France <sup>2</sup>EURECOM, Department of Data Science, Sophia Antipolis, France. Correspondence to: Marco Lorenzi <marco.lorenzi@inria.fr>, Maurizio Filippone <maurizio.filippone@eurecom.fr>.

## 2. Detailed results of the benchmark on ODE parameter inference

In figures 1 and 2, we report the detailed estimate/posterior distribution obtained by the competing methods on the three ODE systems considered in this study.

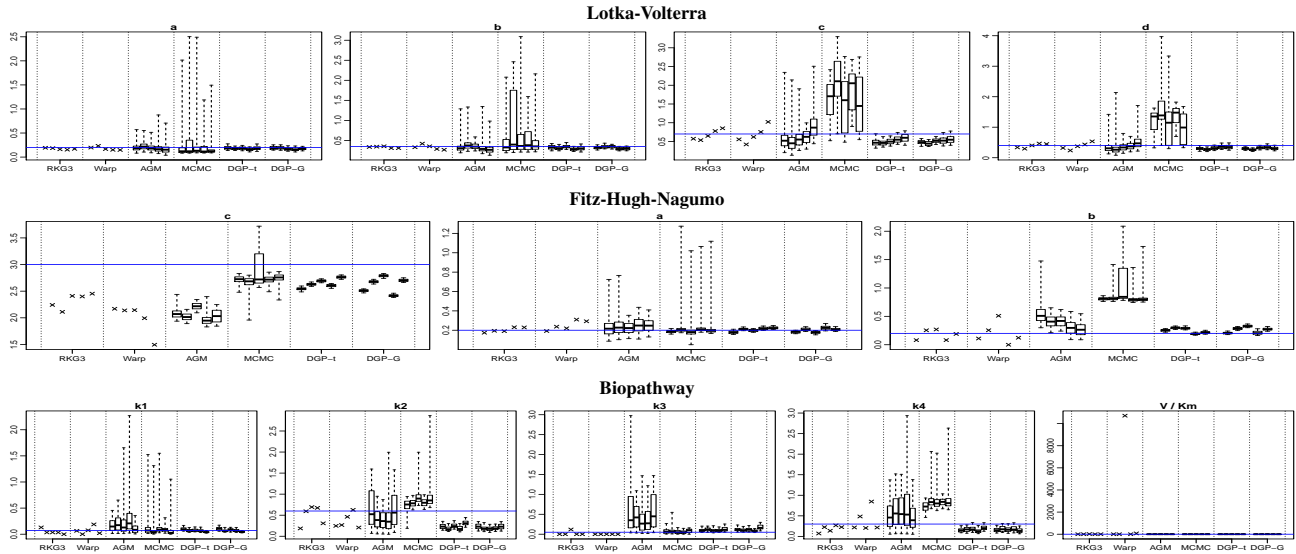

Figure 1. Box-plot of posteriors over model parameters. The five box-plots for each method indicate five different repetitions of the instantiation of the noise.

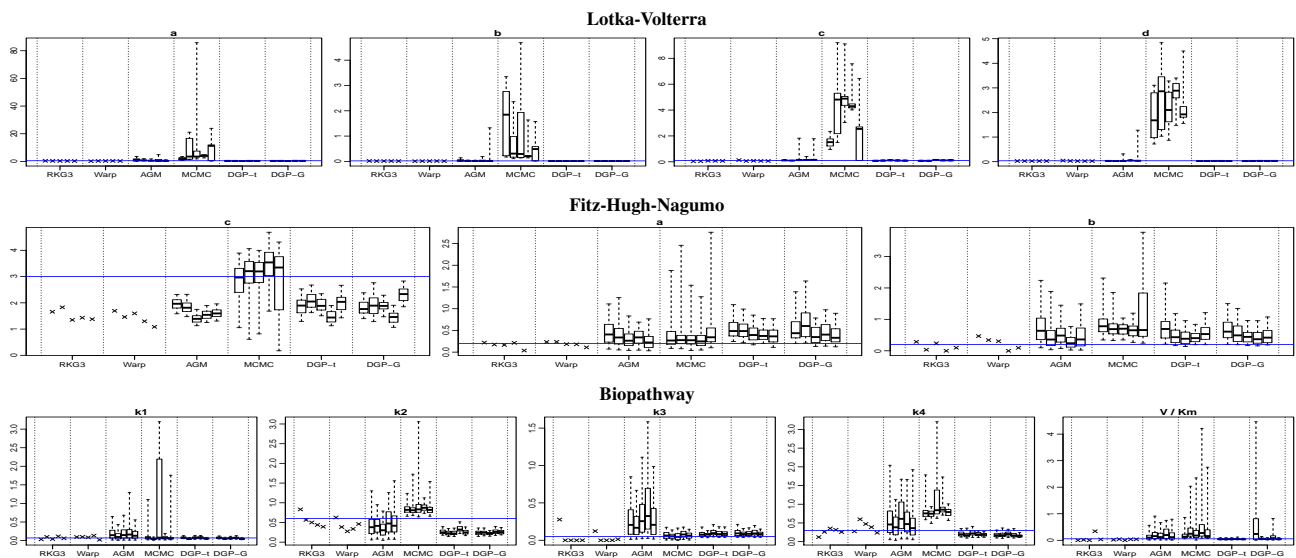

Figure 2. Box-plot of posteriors over model parameters. The five box-plots for each method indicate five different repetitions of the instantiation of the noise.

### 3. Interpolation results using Matérn covariance in shallow GPs

We report here the result of interpolating FitzHugh-Nagumo ODE with GPs with Matérn covariance. Note that the process is still stationary, but it allows for the modeling of non-smooth functions when  $\nu$  is small.

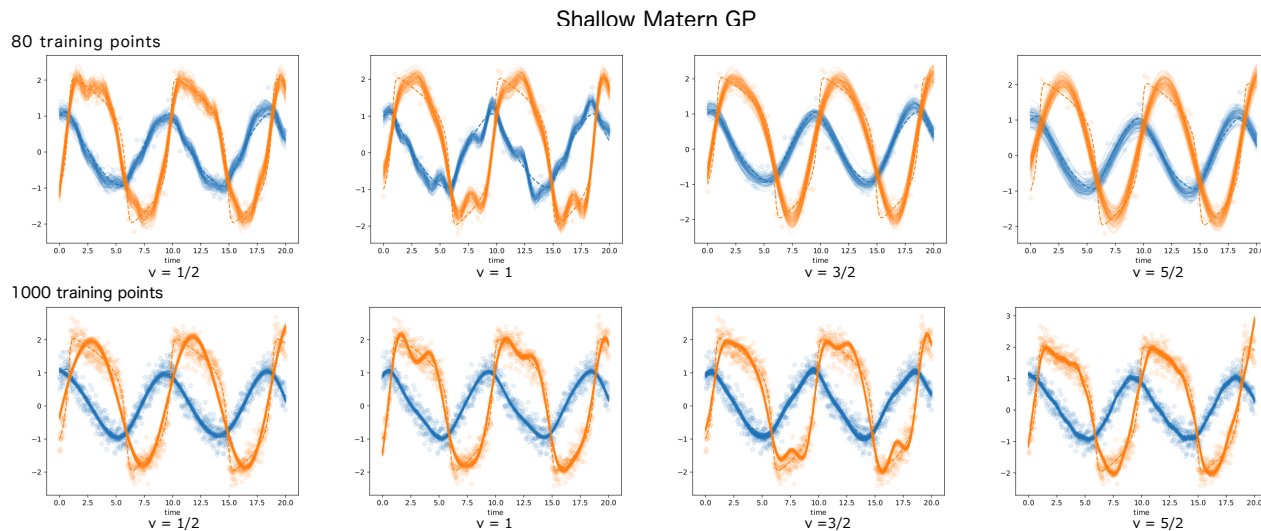

Figure 3. Modeling sampling points from the FitzHugh-Nagumo ODE with GPs with Matérn covariance.

### References

- FitzHugh, R. Mathematical models of threshold phenomena in the nerve membrane. *The bulletin of mathematical biophysics*, 17(4):257–278, 1955.
- Goel, N. S., Maitra, S. C., and Montroll, E. W. On the volterra and other nonlinear models of interacting populations. *Reviews of modern physics*, 43(2):231, 1971.
- Macdonald, B. and Husmeier, D. Gradient Matching Methods for Computational Inference in Mechanistic Models for Systems Biology: A Review and Comparative Analysis. *Frontiers in Bioengineering and Biotechnology*, 3:180, 2015. doi: 10.3389/fbioe.2015.00180. URL <https://www.frontiersin.org/article/10.3389/fbioe.2015.00180>.
- Niu, M., Rogers, S., Filippone, M., and Husmeier, D. Fast Parameter Inference in Nonlinear Dynamical Systems using Iterative Gradient Matching. In Balcan, M. F. and Weinberger, K. Q. (eds.), *Proceedings of The 33rd International Conference on Machine Learning*, volume 48 of *Proceedings of Machine Learning Research*, pp. 1699–1707, New York, New York, USA, June 2016. PMLR. URL <http://proceedings.mlr.press/v48/niu16.html>.
- Vysheirsky, V. and Girolami, M. A. Bayesian ranking of biochemical system models. *Bioinformatics*, 24(6):833–839, 2007.
